# Supplementary material for: Identifying Insects with Incomplete DNA Barcode Libraries, African Fruit Flies (Diptera: Tephritidae) as a Test Case
Source: PLoS One. 2012 Feb 16;7(2):e31581. doi: 10.1371/journal.pone.0031581 (PMC3281081; doi:10.1371/journal.pone.0031581)
Supplement: Data S6 — DNA barcoding identification of 188 intercepted tephritid specimens using a reference library of 622 tephritid DNA barcodes (see Data S1). For each specimen, best DNA barcode match, genetic distance, number of base pair (bp) differences, bp overlapping query-best match, outcome of best match identification (ID) and of best close match ID (with a distance threshold corresponding to THRK2P_0.05 = 0.011) are indicated. Specimens correctly identified according to the best match and best close match criteria are highlighted in grey, identification errors are in yellow. TP: true positive, FP: false positive, TN: true negative, FN: false negative. Species (a) not represented in the reference library, (b) belonging to species complexes or to species groups with known low interspecific divergence and (c) with high intraspecific divergence and in need of taxonomic revision are indicated. (XLS) [file pone.0031581.s006.xls]

## Sheet: tephritid interceptions
interception n.	morphological ID of the query	best DNA barcode match	distance (K2P)	bp differences	overlap	Best match ID (no distance threshold)	Best Close Match ID (THRK2P_0.05 = 0.011)	notes
1	>INT_Bactrocera_cucurbitae_Bangladesh_AB32719781_JEMU	REF Bactrocera cucurbitae Kenya 1407 RMCA	0.0137	43	590	TP	FN
2	>INT_Bactrocera_cucurbitae_Gambia_D20110121112101_JEMU	REF Bactrocera cucurbitae Togo AB33598851 JEMU	0.0801	0	656	TP	FN
3	>INT_Bactrocera_cucurbitae_Ghana_AB00502846_JEMU	REF Bactrocera cucurbitae Benin AB33598857 JEMU	0.0104	80	576	TP	TP
4	>INT_Bactrocera_cucurbitae_Ghana_AB32719758_JEMU	REF Bactrocera cucurbitae Benin AB33598857 JEMU	0.0032	39	617	TP	TP
5	>INT_Bactrocera_invadens_Burkina_Faso_AB32729257_JEMU	REF Bactrocera invadens Guinea AB31536610 JEMU	0.003	0	656	TP	TP
6	>INT_Bactrocera_invadens_Burkina_Faso_AB32729458_JEMU	REF Bactrocera invadens D.R. Congo 1078 JEMU	0	0	562	TP	TP
7	>INT_Bactrocera_invadens_Burkina_Faso_AB32729481_JEMU	REF Bactrocera invadens D.R. Congo 1078 JEMU	0	0	562	TP	TP
8	>INT_Bactrocera_invadens_Burkina_Faso_AB32736264_JEMU	REF Bactrocera invadens D.R. Congo 1078 JEMU	0	0	562	TP	TP
9	>INT_Bactrocera_invadens_Burkina_Faso_AB32736271_JEMU	REF Bactrocera invadens Liberia AB31515625 JEMU	0	0	656	TP	TP
10	>INT_Bactrocera_invadens_Burkina_Faso_AB32736275_JEMU	REF Bactrocera invadens D.R. Congo 1078 JEMU	0	0	562	TP	TP
11	>INT_Bactrocera_invadens_Burkina_Faso_AB32736280_JEMU	REF Bactrocera invadens D.R. Congo 1078 JEMU	0	0	562	TP	TP
12	>INT_Bactrocera_invadens_Burkina_Faso_AB32751364_JEMU	REF Bactrocera invadens Uganda 1079 RMCA	0	0	629	TP	TP
13	>INT_Bactrocera_invadens_Cameroon_AB32729254_JEMU	REF Bactrocera invadens D.R. Congo 1078 JEMU	0	0	562	TP	TP
14	>INT_Bactrocera_invadens_Cameroon_AB32729311_JEMU	REF Bactrocera invadens D.R. Congo 1078 JEMU	0	0	562	TP	TP
15	>INT_Bactrocera_invadens_Cameroon_AB32729347_JEMU	REF Bactrocera invadens Liberia AB31515625 JEMU	0	0	656	TP	TP
16	>INT_Bactrocera_invadens_Cameroon_AB32729449_JEMU	REF Bactrocera invadens D.R. Congo 1078 JEMU	0	0	562	TP	TP
17	>INT_Bactrocera_invadens_Cameroon_AB32729457_JEMU	REF Bactrocera invadens D.R. Congo 1078 JEMU	0	0	562	TP	TP
18	>INT_Bactrocera_invadens_Cameroon_AB32729469_JEMU	REF Bactrocera invadens Liberia AB31515625 JEMU	0	0	656	TP	TP
19	>INT_Bactrocera_invadens_Cameroon_AB32736295_JEMU	REF Bactrocera invadens D.R. Congo 1078 JEMU	0	0	562	TP	TP
20	>INT_Bactrocera_invadens_D.R._Congo_AB40154177_JEMU	REF Bactrocera invadens D.R. Congo 1078 JEMU	0	0	562	TP	TP
21	>INT_Bactrocera_invadens_D.R._Congo_AB40154328_JEMU	REF Bactrocera invadens D.R. Congo 1078 JEMU	0	0	562	TP	TP
22	>INT_Bactrocera_invadens_D.R._Congo_AB40159306_JEMU	REF Bactrocera invadens D.R. Congo 1078 JEMU	0	0	562	TP	TP
23	>INT_Bactrocera_invadens_D.R._Congo_AB40159482_JEMU	REF Bactrocera invadens Guinea AB31536610 JEMU	0.0045	0	656	TP	TP
24	>INT_Bactrocera_invadens_Gambia_D20110121112102_JEMU	REF Bactrocera invadens D.R. Congo 1078 JEMU	0	0	562	TP	TP
25	>INT_Bactrocera_invadens_Ghana_AB32719742_JEMU	REF Bactrocera invadens D.R. Congo 1078 JEMU	0	0	562	TP	TP
26	>INT_Bactrocera_invadens_Ivory_Coast_AB32729370_JEMU	REF Bactrocera invadens Sudan MB1683 RMCA	0.0621	0	629	TP	FN
27	>INT_Bactrocera_invadens_Ivory_Coast_AB32745444_JEMU	REF Bactrocera invadens D.R. Congo 1078 JEMU	0	0	562	TP	TP
28	>INT_Bactrocera_invadens_Ivory_Coast_AB32751351_JEMU	REF Bactrocera invadens D.R. Congo 1078 JEMU	0	0	562	TP	TP
29	>INT_Bactrocera_invadens_Ivory_Coast_AB32751370_JEMU	REF Bactrocera invadens D.R. Congo 1078 JEMU	0	0	562	TP	TP
30	>INT_Bactrocera_invadens_Kenya_AB32714021_JEMU	REF Bactrocera invadens Liberia AB31515625 JEMU	0	0	656	TP	TP
31	>INT_Bactrocera_invadens_Kenya_AB32714123_JEMU	REF Bactrocera invadens Liberia AB31515625 JEMU	0	0	656	TP	TP
32	>INT_Bactrocera_invadens_Kenya_AB32714160_JEMU	REF Bactrocera invadens Liberia AB31515625 JEMU	0	0	656	TP	TP
33	>INT_Bactrocera_invadens_Mali_AB32713885_JEMU	REF Bactrocera invadens Liberia AB31515625 JEMU	0	0	656	TP	TP
34	>INT_Bactrocera_invadens_Mali_AB32713894_JEMU	REF Bactrocera invadens D.R. Congo 1078 JEMU	0	0	562	TP	TP
35	>INT_Bactrocera_invadens_Mali_AB32713921_JEMU	REF Bactrocera invadens D.R. Congo 1078 JEMU	0	0	562	TP	TP
36	>INT_Bactrocera_invadens_Mali_AB32714132_JEMU	REF Bactrocera invadens D.R. Congo 1078 JEMU	0	35	527	TP	TP
37	>INT_Bactrocera_invadens_Mali_AB32714142_JEMU	REF Bactrocera invadens D.R. Congo 1078 JEMU	0	0	562	TP	TP
38	>INT_Bactrocera_invadens_Mali_AB32714155_JEMU	REF Bactrocera invadens Liberia AB31515625 JEMU	0	0	656	TP	TP
39	>INT_Bactrocera_invadens_Mali_AB32714161_JEMU	REF Bactrocera invadens Liberia AB31515625 JEMU	0	0	656	TP	TP
40	>INT_Bactrocera_invadens_Mozambique_AB00502624_JEMU	REF Bactrocera invadens Guinea AB31536610 JEMU	0.0015	0	656	TP	TP
41	>INT_Bactrocera_invadens_Mozambique_AB00502690_JEMU	REF Bactrocera invadens Liberia AB31515625 JEMU	0	34	622	TP	TP
42	>INT_Bactrocera_invadens_Mozambique_AB00502739_JEMU	REF Bactrocera invadens Liberia AB31515625 JEMU	0	0	656	TP	TP
43	>INT_Bactrocera_invadens_Mozambique_AB32719558_JEMU	REF Bactrocera invadens Liberia AB31515625 JEMU	0	0	656	TP	TP
44	>INT_Bactrocera_invadens_Mozambique_AB32719779_JEMU	REF Bactrocera invadens Liberia AB31515625 JEMU	0	0	656	TP	TP
45	>INT_Bactrocera_invadens_Senegal_AB00502676_JEMU	REF Bactrocera invadens Sudan MB1689 RMCA	0.0047	0	656	TP	TP
46	>INT_Bactrocera_invadens_Senegal_AB00502746_JEMU	REF Bactrocera invadens Liberia AB31515625 JEMU	0	0	656	TP	TP
47	>INT_Bactrocera_invadens_Senegal_AB32713908_JEMU	REF Bactrocera invadens D.R. Congo 1078 JEMU	0	0	562	TP	TP
48	>INT_Bactrocera_invadens_Senegal_AB32714143_JEMU	REF Bactrocera invadens D.R. Congo 1078 JEMU	0	0	562	TP	TP
49	>INT_Bactrocera_invadens_Senegal_AB32719515_JEMU	REF Bactrocera invadens Guinea AB31536610 JEMU	0.0015	0	656	TP	TP
50	>INT_Bactrocera_invadens_Senegal_AB32719729_JEMU	REF Bactrocera invadens D.R. Congo 1078 JEMU	0	0	562	TP	TP
51	>INT_Bactrocera_invadens_Togo_AB32714157_JEMU	REF Bactrocera invadens D.R. Congo 1078 JEMU	0	0	562	TP	TP
52	>INT_Bactrocera_oleae_Italy_D20110121112103_JEMU	REF Bactrocera oleae Kenya 1056 JEMU	0.0034	0	586	TP	TP
53	>INT_Bactrocera_zonata_Egypt_AB32714025_JEMU	REF Bactrocera zonata Egypt GBDP2208 06 DQ116360 BOLD	0.0118	0	600	TP	FN
54	>INT_Capparimyia_aristata_Mozambique_AB00502674_JEMU	REF Ceratitis rosa Malawi MB1604 RMCA	0.0973	0	601	FP	TN	(a)
55	>INT_Carpophthoromyia_dimidiata_Mozambique_AB00502801_JEMU	REF Carpophthoromyia dimidiata Tanzania AB32708992 JEMU	0.0123	0	656	TP	FN
56	>INT_Carpophthoromyia_dividua_D.R._Congo_AB40159470_JEMU	REF Carpophthoromyia dividua D.R. Congo AB32740703 JEMU	0.0015	0	656	TP	TP
57	>INT_Carpophthoromyia_dividua_D.R._Congo_AB40159517_JEMU	REF Carpophthoromyia dividua D.R. Congo AB32740703 JEMU	0.003	0	656	TP	TP
58	>INT_Carpophthoromyia_dividua_D.R._Congo_AB40160865_JEMU	REF Carpophthoromyia dividua D.R. Congo AB32740703 JEMU	0.0015	0	656	TP	TP
59	>INT_Carpophthoromyia_dividua_D.R._Congo_AB40160869_JEMU	REF Carpophthoromyia dividua D.R. Congo AB32740703 JEMU	0.0015	0	656	TP	TP
60	>INT_Carpophthoromyia_dividua_D.R._Congo_AB40160896_JEMU	REF Carpophthoromyia dividua D.R. Congo AB32740703 JEMU	0.003	0	656	TP	TP
61	>INT_Carpophthoromyia_pseudotritea_D.R._Congo_AB40159474_JEMU	REF Carpophthoromyia pseudotritea D.R. Congo AB32740697 JEMU	0.0076	0	656	TP	TP
62	>INT_Carpophthoromyia_pseudotritea_D.R._Congo_AB42847634_JEMU	REF Carpophthoromyia dividua D.R. Congo AB32740703 JEMU	0.0232	0	656	FP	TN
63	>INT_Carpophthoromyia_pseudotritea_D.R._Congo_AB42847651_JEMU	REF Carpophthoromyia dividua D.R. Congo AB32740703 JEMU	0.0232	0	656	FP	TN
64	>INT_Carpophthoromyia_radulata_D.R._Congo_AB42886908_JEMU	REF Carpophthoromyia pseudotritea Liberia 1719 RMCA	0.036	0	656	FP	TN	(a)
65	>INT_Carpophthoromyia_tessmanni_D.R._Congo_AB40159450_JEMU	REF Carpophthoromyia tessmanni D.R. Congo AB32740709 JEMU	0.0015	0	656	TP	TP
66	>INT_Ceratitis_anonae_D.R._Congo_AB40154169_JEMU	REF Ceratitis fasciventris Zambia AB32745473 JEMU	0.003	0	656	FP	FP	(b)
67	>INT_Ceratitis_anonae_D.R._Congo_AB40160837_JEMU	REF Ceratitis anonae Kenya 050902 4TNE9 GK APHIS	0.0016	0	619	TP	TP	(b)
68	>INT_Ceratitis_anonae_D.R._Congo_AB40222508_JEMU	REF Ceratitis anonae Cameroon 17 RMCA	0.0015	0	639	TP	TP	(b)
69	>INT_Ceratitis_antistictica_D.R._Congo_AB32719699_JEMU	REF Ceratitis querita Tanzania 1555 RMCA	0.1074	156	446	FP	TN	(a)
70	>INT_Ceratitis_barbata_D.R._Congo_AB42847633_JEMU	REF Ceratitis acicularis Angola MB1596 RMCA	0.0509	0	656	FP	TN	(a)
71	>INT_Ceratitis_barbata_D.R._Congo_AB42861054_JEMU	REF Ceratitis acicularis Angola MB1596 RMCA	0.0509	0	656	FP	TN	(a)
72	>INT_Ceratitis_bremii_Burkina_Faso_D20110121112104_JEMU	REF Ceratitis bremii Senegal AB32745497 JEMU	0.0195	190	466	TP	FN
73	>INT_Ceratitis_bremii_Togo_AB00502616_JEMU	REF Ceratitis bremii Ivory Coast 83 RMCA	0.003	0	656	TP	TP
74	>INT_Ceratitis_capitata_Egypt_AB32719754_JEMU	REF Ceratitis capitata Brazil GBDP2214 06 DQ116368 BOLD	0.0016	0	600	TP	TP	(b)
75	>INT_Ceratitis_capitata_Mozambique_AB32719749_JEMU	REF Ceratitis capitata Tanzania 1015 RMCA	0.003	0	653	TP	TP	(b)
76	>INT_Ceratitis_capitata_South_Africa_AB32751306_JEMU	REF Ceratitis caetrata Kenya 1244 RMCA	0.0018	0	556	FP	FP
77	>INT_Ceratitis_cosyra_Burkina_Faso_AB32728542_JEMU	REF Ceratitis cosyra Botswana AB32736355 JEMU	0.0061	0	656	TP	TP
78	>INT_Ceratitis_cosyra_Burkina_Faso_AB32736254_JEMU	REF Ceratitis cosyra South Africa GBDP2218 06 DQ116372 BOLD	0.0067	0	600	TP	TP
79	>INT_Ceratitis_cosyra_Burkina_Faso_AB32736261_JEMU	REF Ceratitis cosyra Botswana AB32736355 JEMU	0.003	0	656	TP	TP
80	>INT_Ceratitis_cosyra_Burkina_Faso_AB32751316_JEMU	REF Ceratitis cosyra South Africa GBDP2218 06 DQ116372 BOLD	0.0016	0	600	TP	TP
81	>INT_Ceratitis_cosyra_D.R._Congo_AB40159345_JEMU	REF Ceratitis cosyra Cameroon 675 RMCA	0.0107	0	656	TP	TP
82	>INT_Ceratitis_cosyra_Ivory_Coast_AB32736387_JEMU	REF Ceratitis cosyra Kenya 1024 RMCA	0.0015	0	656	TP	TP
83	>INT_Ceratitis_cosyra_Kenya_AB32713927_JEMU	REF Ceratitis cosyra Senegal 681 RMCA	0.003	0	656	TP	TP
84	>INT_Ceratitis_cosyra_Mali_AB32712498_JEMU	REF Ceratitis cosyra Mozambique 1540 RMCA	0.0015	0	656	TP	TP
85	>INT_Ceratitis_cosyra_Mali_AB32712524_JEMU	REF Ceratitis cosyra Senegal 681 RMCA	0.003	0	656	TP	TP
86	>INT_Ceratitis_cosyra_Mali_AB32713900_JEMU	REF Ceratitis cosyra Sudan MB1696 RMCA	0	0	656	TP	TP
87	>INT_Ceratitis_cosyra_Mali_AB32714128_JEMU	REF Ceratitis cosyra Botswana AB32736355 JEMU	0.003	0	656	TP	TP
88	>INT_Ceratitis_cosyra_Mozambique_AB00502697_JEMU	REF Ceratitis cosyra Kenya 1024 RMCA	0.0061	0	656	TP	TP
89	>INT_Ceratitis_cosyra_South_Africa_D20110121112100_JEMU	REF Ceratitis cosyra Mozambique 1540 RMCA	0.0015	0	656	TP	TP
90	>INT_Ceratitis_flava_D.R._Congo_AB32713095_JEMU	REF Ceratitis flava Ivory Coast 1131 JEMU	0.0154	0	656	TP	FN
91	>INT_Ceratitis_millicentae_Mozambique_AB00502749_JEMU	REF Ceratitis millicentae Mozambique 1538 RMCA	0	0	656	TP	TP
92	>INT_Ceratitis_millicentae_Mozambique_AB32719706_JEMU	REF Ceratitis millicentae Mozambique 1538 RMCA	0	0	656	TP	TP
93	>INT_Ceratitis_pedestris_Mozambique_AB00502698_JEMU	REF Ceratitis pedestris Mozambique AB33598941 JEMU	0.003	0	656	TP	TP
94	>INT_Ceratitis_punctata_D.R._Congo_AB40159463_JEMU	REF Ceratitis punctata Ghana 1199 RMCA	0.0015	0	656	TP	TP
95	>INT_Ceratitis_punctata_D.R._Congo_AB42847650_JEMU	REF Ceratitis cf. punctata D.R. Congo AB32745480 JEMU	0.0624	0	656	FP	TN
96	>INT_Ceratitis_rosa_Mozambique_AB00502632_JEMU	REF Ceratitis rosa Kenya 021029 08 GG APHIS	0	0	513	TP	TP
97	>INT_Ceratitis_rosa_Mozambique_AB00502640_JEMU	REF Ceratitis rosa Kenya 010322 09 GK APHIS	0	0	562	TP	TP
98	>INT_Ceratitis_rosa_Mozambique_AB00502661_JEMU	REF Ceratitis rosa Kenya 010322 09 GK APHIS	0	0	562	TP	TP
99	>INT_Ceratitis_serrata_D.R._Congo_AB40159308_JEMU	REF Ceratitis sp. C D.R. Congo AB33598909 JEMU	0.0045	0	656	FP	FP	(a)
100	>INT_Ceratitis_stictica_D.R._Congo_AB40154162_JEMU_	REF Ceratitis stictica Kenya 260602 6 GN APHIS	0.0317	0	583	TP	FN
101	>INT_Ceratitis_stictica_D.R._Congo_AB42886904_JEMU	REF Ceratitis stictica Kenya 260602 6 GN APHIS	0.0317	0	583	TP	FN
102	>INT_Dacus_africanus_Mozambique_AB00502728_JEMU	REF Dacus vertebratus Botswana AB32736382 JEMU	0.1247	0	656	FP	TN	(a)
103	>INT_Dacus_africanus_Mozambique_AB00502811_JEMU	REF Dacus vertebratus Botswana AB32736382 JEMU	0.1247	0	656	FP	TN	(a)
104	>INT_Dacus_africanus_Mozambique_AB32719766_JEMU	REF Dacus vertebratus Botswana AB32736382 JEMU	0.121	0	656	FP	TN	(a)
105	>INT_Dacus_armatus_D.R._Congo_AB40159515_JEMU	REF Dacus armatus Benin 953 RMCA	0.0015	0	656	TP	TP
106	>INT_Dacus_armatus_D.R._Congo_AB40160908_JEMU	REF Dacus armatus Benin 953 RMCA	0.033	0	656	TP	FN
107	>INT_Dacus_armatus_Ghana_AB32719786_JEMU	REF Dacus armatus Benin 953 RMCA	0	0	656	TP	TP
108	>INT_Dacus_armatus_Togo_AB00502709_JEMU	REF Dacus armatus Benin 975 RMCA	0.0061	0	656	TP	TP
109	>INT_Dacus_bivittatus_D.R._Congo_AB40154199_JEMU	REF Dacus bivittatus Botswana AB33605761 JEMU	0	0	656	TP	TP
110	>INT_Dacus_bivittatus_D.R._Congo_AB40154346_JEMU	REF Dacus bivittatus Nigeria 1061 RMCA	0.003	0	656	TP	TP
111	>INT_Dacus_bivittatus_D.R._Congo_AB40154347_JEMU	REF Dacus bivittatus Botswana AB33605761 JEMU	0.0015	0	656	TP	TP
112	>INT_Dacus_bivittatus_D.R._Congo_AB40159312_JEMU	REF Dacus bivittatus Botswana AB33605761 JEMU	0	0	656	TP	TP
113	>INT_Dacus_bivittatus_D.R._Congo_AB40159528_JEMU	REF Dacus bivittatus Botswana AB33605761 JEMU	0	0	656	TP	TP
114	>INT_Dacus_bivittatus_Ghana_AB00502841_JEMU	REF Dacus bivittatus Botswana AB33605761 JEMU	0	0	656	TP	TP
115	>INT_Dacus_bivittatus_Ghana_AB32719525_JEMU	REF Dacus bivittatus Botswana AB33605761 JEMU	0.0015	0	656	TP	TP
116	>INT_Dacus_bivittatus_Ghana_AB32719717_JEMU	REF Dacus bivittatus Botswana AB33605761 JEMU	0.0015	0	656	TP	TP
117	>INT_Dacus_bivittatus_Ghana_AB32719723_JEMU	REF Dacus bivittatus Botswana AB33605761 JEMU	0	0	656	TP	TP
118	>INT_Dacus_bivittatus_Ghana_AB32719753_JEMU	REF Dacus bivittatus Ethiopia MB1622 RMCA	0	53	603	TP	TP
119	>INT_Dacus_bivittatus_Mozambique_AB00502614_JEMU	REF Dacus bivittatus Botswana AB33605761 JEMU	0.0015	0	656	TP	TP
120	>INT_Dacus_bivittatus_Mozambique_AB00502721_JEMU	REF Dacus bivittatus Botswana AB33605761 JEMU	0.0015	0	656	TP	TP
121	>INT_Dacus_bivittatus_Mozambique_AB32719767_JEMU	REF Dacus bivittatus Botswana AB33605761 JEMU	0.0015	0	656	TP	TP
122	>INT_Dacus_chiwira_Mozambique_AB00502628_JEMU	REF Dacus chiwira Mozambique 1542 RMCA	0.0031	0	644	TP	TP
123	>INT_Dacus_chiwira_Mozambique_AB00502699_JEMU	REF Dacus chiwira Mozambique 1542 RMCA	0.0093	0	644	TP	TP
124	>INT_Dacus_chiwira_Mozambique_AB00502715_JEMU	REF Dacus chiwira Mozambique 1542 RMCA	0.0062	0	644	TP	TP
125	>INT_Dacus_chiwira_Mozambique_AB00502725_JEMU	REF Dacus chiwira Mozambique 1732 RMCA	0.0076	0	656	TP	TP
126	>INT_Dacus_chiwira_Mozambique_AB00502812_JEMU	REF Dacus chiwira Mozambique 1542 RMCA	0.0094	0	644	TP	TP
127	>INT_Dacus_chiwira_Mozambique_AB32719704_JEMU	REF Dacus chiwira Mozambique 1542 RMCA	0.0078	0	644	TP	TP
128	>INT_Dacus_ciliatus_D.R._Congo_AB40154311_JEMU	REF Dacus ciliatus Gabon RMCAENT000010686 JEMU	0.0015	0	656	TP	TP
129	>INT_Dacus_ciliatus_Ghana_AB00502677_JEMU	REF Dacus ciliatus Gabon RMCAENT000010686 JEMU	0.0015	0	656	TP	TP
130	>INT_Dacus_ciliatus_Ghana_AB00502694_JEMU	REF Dacus ciliatus Mozambique 1390 RMCA	0.0015	0	656	TP	TP
131	>INT_Dacus_ciliatus_Ghana_AB00502695_JEMU	REF Dacus ciliatus Nigeria 1391 RMCA	0	0	656	TP	TP
132	>INT_Dacus_ciliatus_Ghana_AB00502701_JEMU	REF Dacus ciliatus Namibia 1713 RMCA	0.0061	0	656	TP	TP
133	>INT_Dacus_ciliatus_Ghana_AB00502829_JEMU	REF Dacus ciliatus Nigeria 1391 RMCA	0.0015	0	656	TP	TP
134	>INT_Dacus_ciliatus_Ghana_AB00502838_JEMU	REF Dacus ciliatus Gabon RMCAENT000010686 JEMU	0.0015	0	656	TP	TP
135	>INT_Dacus_ciliatus_Ghana_AB32719691_JEMU	REF Dacus ciliatus Botswana AB33605767 JEMU	0.003	0	656	TP	TP
136	>INT_Dacus_ciliatus_Ghana_AB32719694_JEMU	REF Dacus ciliatus Gabon RMCAENT000010686 JEMU	0.0015	0	656	TP	TP
137	>INT_Dacus_ciliatus_Ghana_AB32719695_JEMU	REF Dacus ciliatus Mozambique 1390 RMCA	0.0015	0	656	TP	TP
138	>INT_Dacus_ciliatus_Ghana_AB32719700_JEMU	REF Dacus ciliatus Gabon RMCAENT000010686 JEMU	0.0015	0	656	TP	TP
139	>INT_Dacus_ciliatus_Ghana_AB32719713_JEMU	REF Dacus ciliatus Gabon RMCAENT000010686 JEMU	0.0015	0	656	TP	TP
140	>INT_Dacus_ciliatus_Ghana_AB32719716_JEMU	REF Dacus ciliatus Gabon RMCAENT000010686 JEMU	0.0015	0	656	TP	TP
141	>INT_Dacus_ciliatus_Ghana_AB32719734_JEMU	REF Dacus ciliatus Gabon RMCAENT000010686 JEMU	0.0015	0	656	TP	TP
142	>INT_Dacus_ciliatus_Ghana_AB32719737_JEMU	REF Dacus ciliatus Mozambique 1390 RMCA	0	0	656	TP	TP
143	>INT_Dacus_ciliatus_Ghana_AB32719769_JEMU	REF Dacus ciliatus Mozambique 1390 RMCA	0.0045	0	656	TP	TP
144	>INT_Dacus_diastatus_AB00502645_Togo_JEMU	REF Dacus diastatus D.R. Congo AB35160696 JEMU	0.0107	0	656	TP	TP
145	>INT_Dacus_durbanensis_Mozambique_AB00502634_JEMU	REF Dacus durbanensis Kenya 1065 RMCA	0.0083	54	602	TP	TP
146	>INT_Dacus_durbanensis_Mozambique_AB00502675_JEMU	REF Dacus durbanensis Kenya 1065 RMCA	0.0036	113	543	TP	TP
147	>INT_Dacus_famona_Mozambique_AB00502744_JEMU	REF Dacus famona Tanzania 981 RMCA	0.003	0	656	TP	TP
148	>INT_Dacus_fumosus_D.R._Congo_AB40154202_JEMU	REF Dacus armatus Ivory Coast 583 JEMU	0.1005	0	535	FP	TN	(a)
149	>INT_Dacus_fuscovittatus_Togo_AB00502738_JEMU	REF Dacus carnesi Liberia AB35139011 JEMU	0.1323	0	656	FP	TN
150	>INT_Dacus_gypsoides_D.R._Congo_AB40159326_JEMU	REF Dacus humeralis Benin 958 RMCA	0.1355	0	656	FP	TN	(a)
151	>INT_Dacus_humeralis_D.R._Congo_AB40159502_JEMU	REF Dacus humeralis Benin 1316 RMCA	0.0015	0	656	TP	TP	(c)
152	>INT_Dacus_humeralis_D.R._Congo_AB40160859_JEMU	REF Dacus humeralis Ivory Coast 568 RMCA	0.0867	0	656	TP	FN	(c)
153	>INT_Dacus_humeralis_D.R._Congo_AB42861085_JEMU	REF Dacus eclipsis South Africa 1552 RMCA	0.0994	55	555	FP	TN	(c)
154	>INT_Dacus_humeralis_Togo_AB00502620_JEMU	REF Dacus humeralis Benin 979 RMCA	0	0	656	TP	TP	(c)
155	>INT_Dacus_humeralis_Togo_AB00502745_JEMU	REF Dacus humeralis Benin 979 RMCA	0.003	0	656	TP	TP	(c)
156	>INT_Dacus_humeralis_Togo_AB32719705_JEMU	REF Dacus humeralis Benin 979 RMCA	0.0015	0	656	TP	TP	(c)
157	>INT_Dacus_langi_D.R._Congo_AB40159518_JEMU	REF Dacus langi Uganda 954 RMCA	0.0139	0	656	TP	FN
158	>INT_Dacus_pallidilatus_Mozambique_AB00502627_JEMU	REF Dacus pallidilatus Mozambique 1541 RMCA	0	0	629	TP	TP
159	>INT_Dacus_punctatifrons_D.R._Congo_AB32713443_JEMU	REF Dacus punctatifrons Benin 714 RMCA	0	0	656	TP	TP
160	>INT_Dacus_punctatifrons_D.R._Congo_AB32713470_JEMU	REF Dacus punctatifrons Benin 714 RMCA	0	0	656	TP	TP
161	>INT_Dacus_punctatifrons_D.R._Congo_AB32745464_JEMU	REF Dacus punctatifrons Benin 714 RMCA	0	0	656	TP	TP
162	>INT_Dacus_punctatifrons_D.R._Congo_AB40159534_JEMU	REF Dacus punctatifrons Benin 714 RMCA	0	0	656	TP	TP
163	>INT_Dacus_punctatifrons_Mozambique_AB00502639_JEMU	REF Dacus punctatifrons Benin 714 RMCA	0.003	0	656	TP	TP
164	>INT_Dacus_punctatifrons_Mozambique_AB00502648_JEMU	REF Dacus punctatifrons D.R. Congo 959 RMCA	0	0	656	TP	TP
165	>INT_Dacus_radmirus_D.R._Congo_AB40159334_JEMU	REF Dacus radmirus D.R. Congo AB32740681 JEMU	0.003	0	656	TP	TP
166	>INT_Dacus_setilatens_D.R._Congo_AB40159494_JEMU	REF Dacus setilatens D.R. Congo AB32740690 JEMU	0.0186	0	656	TP	FN
167	>INT_Dacus_theophrastus_Togo_AB00502713_JEMU	REF Dacus theophrastus Benin 990 RMCA	0.003	0	656	TP	TP
168	>INT_Dacus_vertebratus_Ghana_AB00502805_JEMU	REF Bactrocera amplexa Kenya 1052 JEMU	0	0	527	FP	FP
169	>INT_Dacus_vertebratus_Ghana_AB00502815_JEMU	REF Dacus vertebratus Yemen MB1644 RMCA	0.003	0	656	TP	TP
170	>INT_Dacus_vertebratus_Ghana_AB32719512_JEMU	REF Dacus vertebratus Yemen MB1644 RMCA	0.0259	221	435	TP	FN
171	>INT_Dacus_vertebratus_Ghana_AB32719513_JEMU	REF Dacus vertebratus Tanzania 589 RMCA	0.0076	0	656	TP	TP
172	>INT_Dacus_vertebratus_Ghana_AB32719724_JEMU	REF Dacus vertebratus Tanzania 589 RMCA	0.003	0	656	TP	TP
173	>INT_Dacus_vertebratus_Ghana_AB32719730_JEMU	REF Dacus vertebratus Yemen MB1644 RMCA	0.0015	0	656	TP	TP
174	>INT_Dacus_vertebratus_Ghana_AB32719741_JEMU	REF Dacus vertebratus Tanzania 589 RMCA	0.0041	177	479	TP	TP
175	>INT_Dacus_vertebratus_Ghana_AB32719763_JEMU	REF Dacus vertebratus Yemen MB1644 RMCA	0.018	261	395	TP	FN
176	>INT_Dacus_vertebratus_Ghana_AB32719764_JEMU	REF Dacus vertebratus Nigeria 1400 RMCA	0.0034	81	575	TP	TP
177	>INT_Dacus_vertebratus_Ghana_AB32719765_JEMU	REF Dacus vertebratus Botswana AB32736382 JEMU	0.004	410	246	TP	TP
178	>INT_Dacus_vertebratus_Ghana_AB32719783_JEMU	REF Dacus vertebratus Nigeria 1400 RMCA	0.0163	99	557	TP	FN
179	>INT_Perilampsis_curta_Swaziland_AB32712845_JEMU	REF Perilampsis curta Mozambique 1736 RMCA	0.0015	0	656	TP	TP
180	>INT_Perilampsis_pulchella_D.R._Congo_AB42861051_JEMU	REF Perilampsis pulchella Rwanda AB31509508 JEMU	0.0092	0	656	TP	TP
181	>INT_Trirhithrum_albonigrum_D.R._Congo_AB32715569_JEMU	REF Trirhithrum demeyeri Kenya 021017 03TNE7 GK APHIS	0.0828	0	583	FP	TN	(a)
182	>INT_Trirhithrum_coffeae_D.R._Congo_AB40154310_JEMU	REF Trirhithrum coffeae Ivory Coast 1198 RMCA	0.0092	0	656	TP	TP
183	>INT_Trirhithrum_coffeae_D.R._Congo_AB42886882_JEMU	REF Trirhithrum coffeae Ivory Coast 1197 RMCA	0.003	0	656	TP	TP
184	>INT_Trirhithrum_fraternum_D.R._Congo_AB32745432_JEMU	REF Trirhithrum nigerrimum Kenya 1182 RMCA	0.017	0	656	FP	TN	(a)
185	>INT_Trirhithrum_fraternum_D.R._Congo_AB40159454_JEMU	REF Trirhithrum nigerrimum Kenya 1182 RMCA	0.0186	0	656	FP	TN	(a)
186	>INT_Trirhithrum_fraternum_D.R._Congo_AB40159516_JEMU	REF Trirhithrum nigerrimum Kenya 1182 RMCA	0.017	0	656	FP	TN	(a)
187	>INT_Trirhithrum_nigerrimum_D.R._Congo_AB40159303_JEMU	REF Trirhithrum nigerrimum Kenya 1182 RMCA	0	0	656	TP	TP
188	>INT_Trirhithrum_obscurum_D.R._Congo_AB40159452_JEMU	REF Trirhithrum teres Kenya 021017 08TNE7 GK APHIS	0.0781	0	583	FP	TN
